# Supplementary material for: Neuropsychology of Neuroendocrine Dysregulation after Traumatic Brain Injury
Source: J Clin Med. 2015 May 20;4(5):1051–62. doi: 10.3390/jcm4051051 (PMC4470216; doi:10.3390/jcm4051051)
Supplement: Supplementary File 1 [file jcm-04-01051-s001.pdf]

# Supplementary Information

**Table S1.** Mental functions and brain structures involved (simplified synopsis).

| Domains                                  | Brain Structures                                                 |
|------------------------------------------|------------------------------------------------------------------|
| <b>Perception</b>                        |                                                                  |
| Vision                                   | occipital lobe (striate and extrastriate visual areas)           |
| Audition                                 | temporal lobe (primary and secondary auditory areas)             |
| Body perception                          | parietal lobe (somatosensory areas)                              |
| Gustation                                | thalamus, hypothalamus, temporal and orbitofrontal areas         |
| Olfaction                                | thalamus, temporal and orbitofrontal areas                       |
| <b>Attention</b>                         |                                                                  |
| Alertness (vigilance)                    | reticular formation (brain stem, midbrain)                       |
| Selective attention                      | thalamus, prefrontal cortex                                      |
| Divided attention                        | prefrontal cortex                                                |
| Spatial attention                        | posterior parietal cortex; thalamus                              |
| Attention regulation (executive control) | prefrontal cortex                                                |
| <b>Memory</b>                            |                                                                  |
| Episodic memory                          | hippocampus, thalamus, temporal and prefrontal areas             |
| Semantic memory                          | hippocampus, (temporal) association areas                        |
| Procedural memory                        | premotor areas, basal ganglia, cerebellum                        |
| <b>Executive functions</b>               | (lateral) prefrontal areas                                       |
| <b>Affective regulation</b>              | orbitofrontal areas, limbic system (incl. temporal lobe), insula |

**Table S2.** Mental domains and functional significance.

| Domains                         | Functional Significance                                                                                       |
|---------------------------------|---------------------------------------------------------------------------------------------------------------|
| <b>Attention</b>                |                                                                                                               |
| Alertness (vigilance)           | preparedness to respond or act                                                                                |
| Information processing capacity | speed and accuracy of information processing                                                                  |
| Sustained attention             | maintenance of attention at a given level for an extended length of time                                      |
| Divided attention               | attention to two or more stimuli/actions at the same (prerequisite to perform concurrently two or more tasks) |
| Spatial attention               | distribution of attention in space (global (parallel) processing, local processing)                           |
| <b>Memory</b>                   |                                                                                                               |
| Short-term memory               | recall (reproduction or recognition) of a limited number of stimuli without further elaboration               |
| Working memory                  | recall (reproduction or recognition) of a limited number of stimuli with further elaboration                  |
| Episodic memory                 | memory for specific, personally experienced events in a given context (time, place, <i>etc.</i> )             |
| Semantic memory                 | memory for general or domain-specific knowledge or information                                                |
| Verbal memory                   | capacity to remember (reproduction or recognition) written or spoken material                                 |
| Visual memory                   | capacity to remember (reproduction or recognition) visual images                                              |

**Table 2. Cont.**

| <b>Domains</b>              | <b>Functional Significance</b>                                                                                                                                  |
|-----------------------------|-----------------------------------------------------------------------------------------------------------------------------------------------------------------|
| <b>Executive function</b>   |                                                                                                                                                                 |
| Planning                    | mental outline of the steps required to perform a task or solve a problem                                                                                       |
| Problem solving             | process by which individuals attempt to overcome difficulties in a given complex task condition                                                                 |
| Cognitive flexibility       | objective appraisal and appropriate flexible action, e.g., ability to change between visual or verbal stimuli or between actions                                |
| Multi-tasking               | ability to perform more than one action/task at a time, requiring multiple information processing, working memory, divided attention, and monitoring of actions |
| <b>Affective state/mood</b> | any type of emotional state, associated with an emotional response bias for days or weeks                                                                       |

**Table S3.** Recommendations for a standardized assessment of cognition and mood (for a detailed and comprehensive description of assessment measures, see [1]).

| <b>Domains</b>                  | <b>Test(s)</b>                                                                                                  |
|---------------------------------|-----------------------------------------------------------------------------------------------------------------|
| <b>Premorbid intelligence</b>   | Verbal IQ-scale of the WAIS-R;<br>National Adult Reading Test (NART)                                            |
| <b>Attention</b>                |                                                                                                                 |
| Alertness (vigilance)           | Reaction time with (phasic alertness) and without warning signals (tonic alertness)                             |
| Information processing capacity | Trail Making Test (TMT) A                                                                                       |
| Sustained attention             | Continued Performance Tests (CPT)                                                                               |
| Divided attention               | Stroop Test; Symbol Digit Modalities Test (SDMT);<br>Paced Auditory Serial Addition Test (PASAT)                |
| Spatial attention               | cancellation tests; visual search tests                                                                         |
| <b>Memory</b>                   |                                                                                                                 |
| Short-term memory               | digit span forward; block tapping forward                                                                       |
| Working memory                  | digit span backward; block tapping backward                                                                     |
| Semantic memory                 |                                                                                                                 |
| Verbal memory                   | Auditory Verbal Learning tests; story recall<br>(Logical Memory; WMS III/IV)                                    |
| Visual memory                   | Visual reproductions (WMS III/IV); Camden Memory tests                                                          |
| <b>Executive function</b>       |                                                                                                                 |
| Planning                        | Tower of London Test; Porteus Maze Test                                                                         |
| Problem solving                 | Tower of London Test;<br>Raven's Coloured Progressive Matrices (RCPM);                                          |
| Cognitive flexibility           | Trail making Test (TMT) B; Wisconsin Card Sorting Test (WCST);<br>verbal fluency tests (COWAT)                  |
| Multi-tasking                   | Symbol Digit Modalities Test (SDMT);<br>Paced Auditory Serial Addition Test (PASAT); Stroop Tests               |
| <b>Affective state/mood</b>     | Beck Depression Inventory (BDI); Hospital Anxiety and Depression Scale (HADS); Geriatric Depression Scale (GDS) |

**Reference**

1. Behan, L.A.; Phillips, J.; Thompson, C.J.; Agha, A. Neuroendocrine disorders after traumatic brain injury. *J. Neurol. Neurosurg. Psychiatry* **2008**, *79*, 753–759.
